# Supplementary material for: Biomolecular condensates as stress sensors and modulators of bacterial signaling
Source: PubMed Central journal article supplement (PMC11326607; doi:10.1371/journal.ppat.1012413), 2024-08-15

# Biomolecular condensates as stress sensors and modulators of bacterial signaling

Moeka Sasazawa<sup>1</sup>, Dylan T. Tomares<sup>2,+</sup>, W. Seth Childers<sup>2,\*</sup>, Saumya Saurabh<sup>1,\*</sup>

## Supplementary information

S1 Figure

**Figure S1.** Bar plots showing Gene Ontology (GO) term analyses of IDPs from ESKAPE pathogens. The numbers above each bar represent the total number of IDPs that were included in the analyses. Each IDP's GO term annotation was obtained from Uniprot. GO term categories that occupied less than 2% in all species are excluded from the graph.

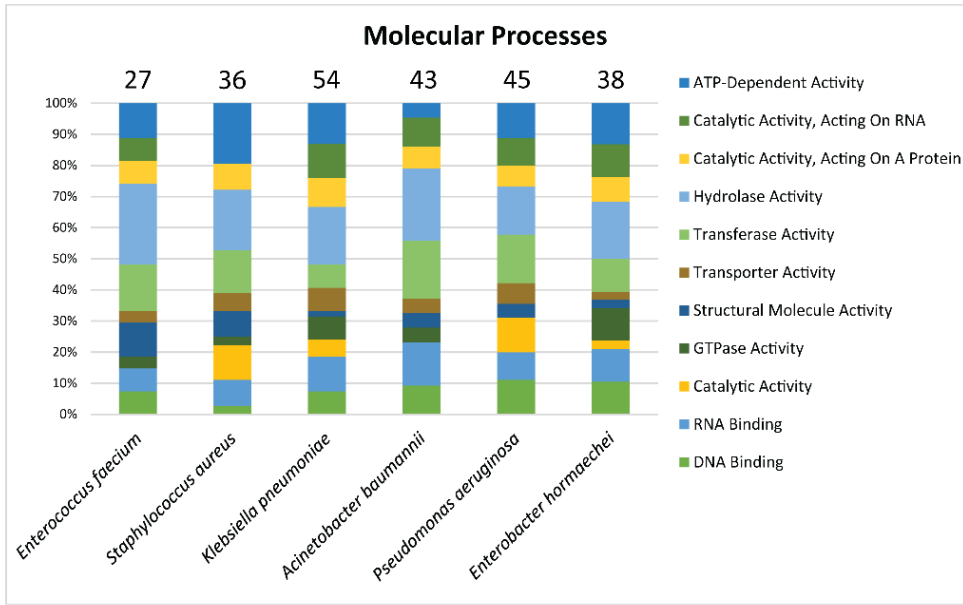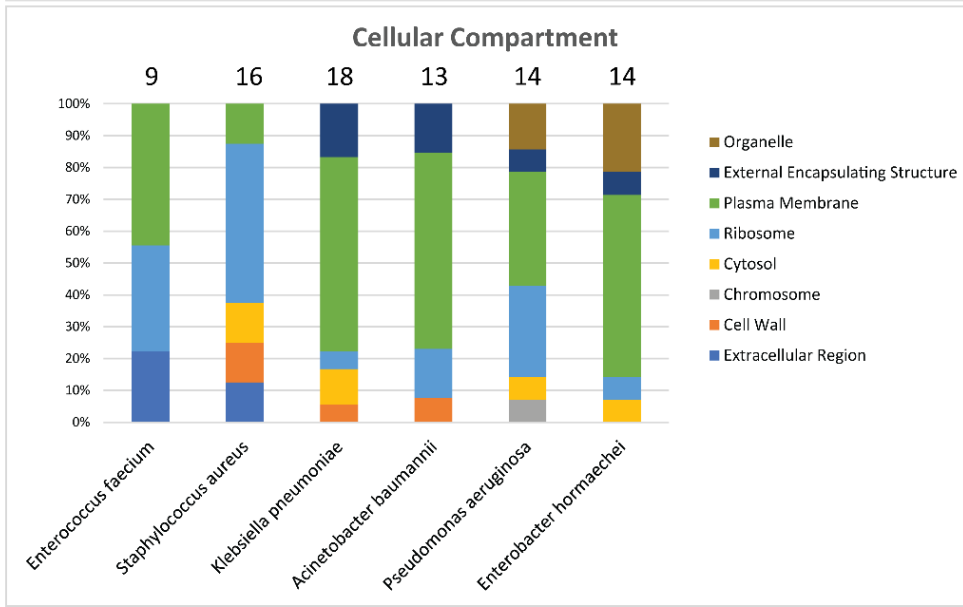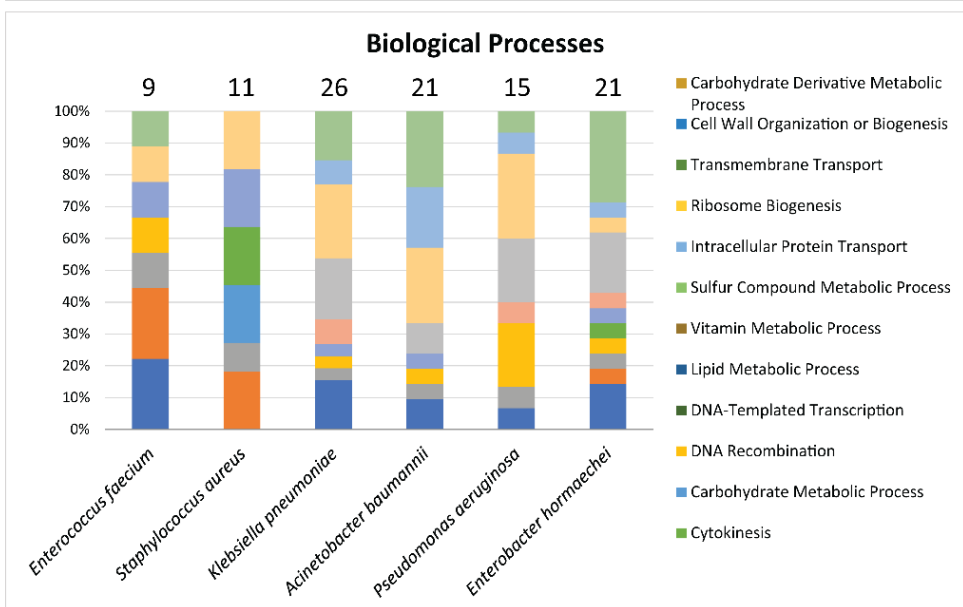

Supplement: ppat.1012413.s001.pdf [file ppat.1012413.s001.pdf]
