# Supplementary material for: Biomolecular condensates as stress sensors and modulators of bacterial signaling
Source: PubMed Central journal article supplement (PMC11326607; doi:10.1371/journal.ppat.1012413), 2024-08-15
Supplement: ppat.1012413.s002.pdf [file ppat.1012413.s002.pdf]

# Biomolecular condensates as stress sensors and modulators of bacterial signaling

Moeka Sasazawa<sup>1</sup>, Dylan T. Tomares<sup>2,+</sup>, W. Seth Childers<sup>2,\*</sup>, Saumya Saurabh<sup>1,\*</sup>

## Supplementary information

**Table S1:** Abundance of IDPs in pathogens, free-living and endosymbiotic microbes

| Bacteria                                                | Total Proteins | IDPs with >50 disordered residues | IDPs with >30 disordered residues |
|---------------------------------------------------------|----------------|-----------------------------------|-----------------------------------|
| <i>Enterococcus faecium</i>                             | 2825           | 74                                | 153                               |
| <i>Staphylococcus aureus</i>                            | 2622           | 90                                | 175                               |
| <i>Klebsiella pneumoniae</i>                            | 5137           | 80                                | 186                               |
| <i>Acinetobacter baumannii</i>                          | 3785           | 80                                | 178                               |
| <i>Pseudomonas aeruginosa</i>                           | 5863           | 144                               | 318                               |
| <i>Enterobacter spp.</i>                                | 4070           | 93                                | 195                               |
| <i>Caulobacter crescentus</i>                           | 3859           | 143                               | 330                               |
| <i>Saccharomyces cerevisiae</i> (Baker's yeast)         | 6245           | 1442                              | 2079                              |
| <i>Wolbachia endosymbiont of Cylindrocapsa convexus</i> | 1643           | 31                                | 69                                |
| <i>Rickettsia rickettsii</i>                            | 1343           | 18                                | 38                                |
| <i>Rickettsia felis</i>                                 | 1619           | 29                                | 57                                |
| <i>Rickettsia conorii</i>                               | 1371           | 18                                | 37                                |
| <i>Rickettsia argasii</i>                               | 1689           | 21                                | 51                                |
| <i>Ehrlichia chaffeensis</i>                            | 1100           | 24                                | 53                                |
| <i>Anaplasma phagocytophilum</i>                        | 1614           | 49                                | 95                                |
